# Supplementary material
Source: PubMed Central journal article supplement (PMC2823438)
Supplement: supp_M109.038398_suppfig2.pdf [file supp_M109.038398_suppfig2.pdf]

## Supplemental Figure 2

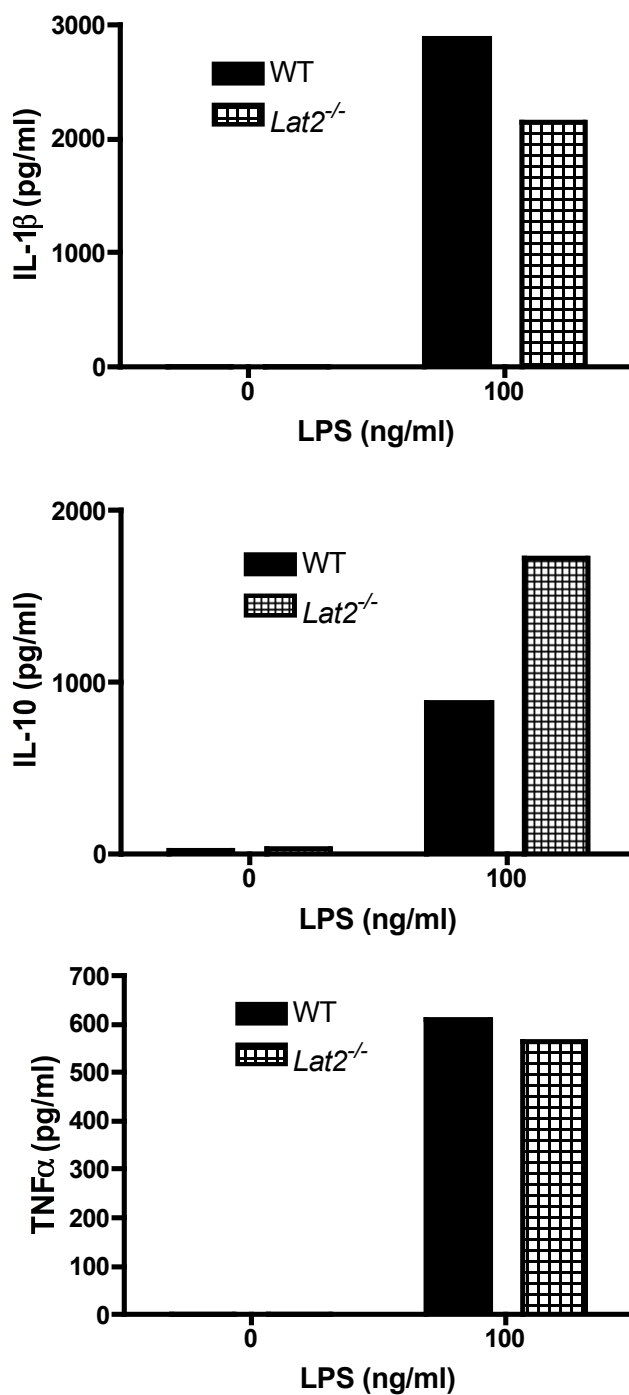

### Supplemental Figure 2: *Lat2*<sup>-/-</sup> M $\Phi$ display a skewed LPS-induced cytokine profile

BMM $\Phi$  from WT and *Lat2*<sup>-/-</sup> mice were stimulated for 24hrs with 100ng/ml LPS. Supernatants were quantified for IL-1 $\beta$ , IL-10 and TNF $\alpha$  using the LINCoplex cytokine assay. Solid bars represent WT, hatched bars represent *Lat2*<sup>-/-</sup>. Results are representative of at least 2 independent experiments with a pool of 3 mice in each.
